# Supplementary material for: Factoring the brain signatures of anesthesia concentration and level of arousal across individuals
Source: PubMed Central journal article supplement — Neuroimage Clin. 2015 Sep 3;9:385–91. doi: 10.1016/j.nicl.2015.08.013 (PMC4588413; doi:10.1016/j.nicl.2015.08.013), 2015-09-03

**a** Awake Moderate Deep Recovery

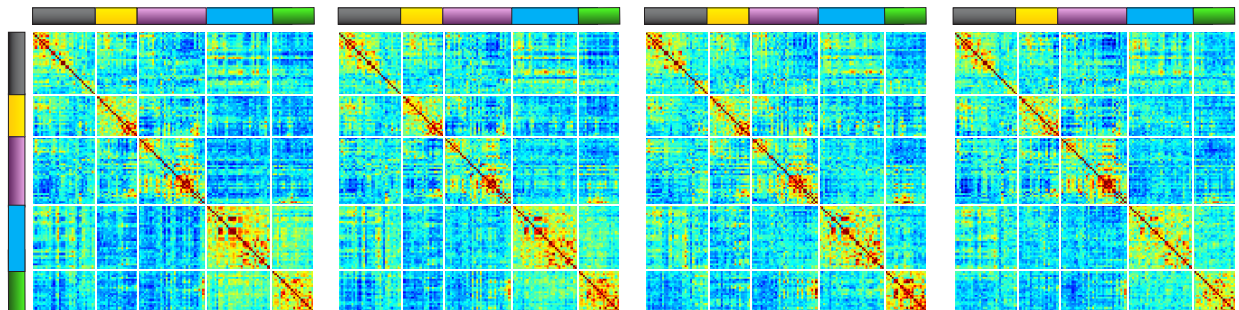

- Cingulo-opercular
- Fronto-parietal
- Default
- Sensorimotor
- Occipital

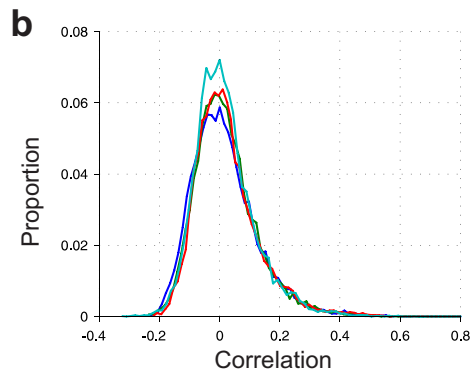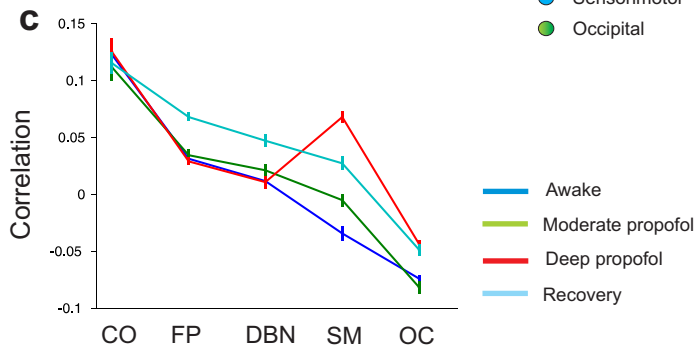

Supplement: mmc2.pdf [file mmc2.pdf]
