# Supplementary material for: Factoring the brain signatures of anesthesia concentration and level of arousal across individuals
Source: PubMed Central journal article supplement — Neuroimage Clin. 2015 Sep 3;9:385–91. doi: 10.1016/j.nicl.2015.08.013 (PMC4588413; doi:10.1016/j.nicl.2015.08.013), 2015-09-03
Supplement: mmc3.pdf [file mmc3.pdf]

**a** Propofol in blood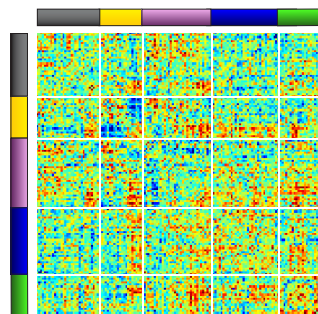**b** Behavioural response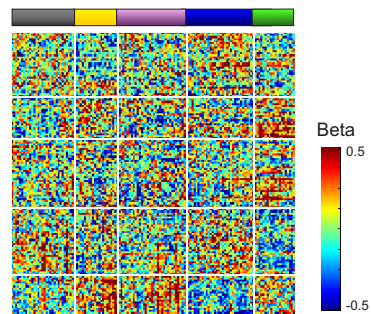

Beta  
0.5  
-0.5

- Cingulo-opercular
- Fronto-parietal
- Default
- Sensorimotor
- Occipital

**c**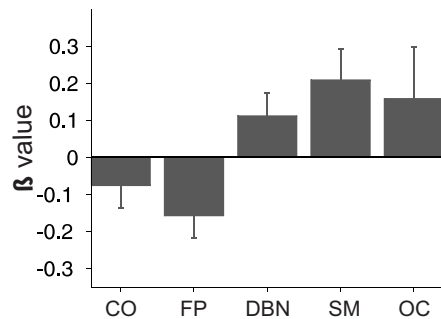**d**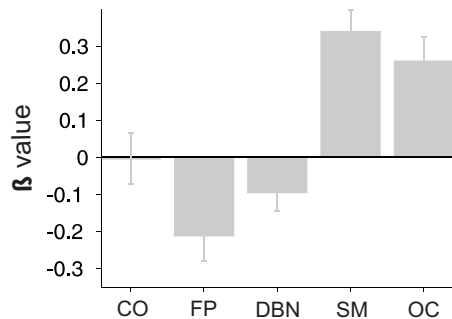

- Behavioural response
- Propofol level
