# Supplementary material for: Factoring the brain signatures of anesthesia concentration and level of arousal across individuals
Source: PubMed Central journal article supplement — Neuroimage Clin. 2015 Sep 3;9:385–91. doi: 10.1016/j.nicl.2015.08.013 (PMC4588413; doi:10.1016/j.nicl.2015.08.013), 2015-09-03
Supplement: mmc4.pdf [file mmc4.pdf]

Right thalamus

Left thalamus

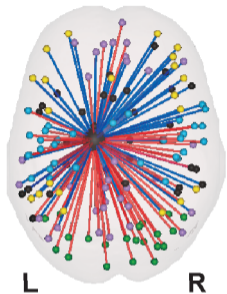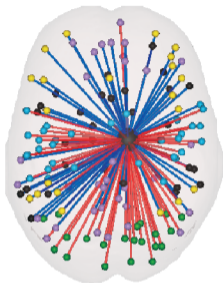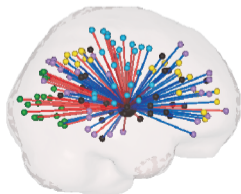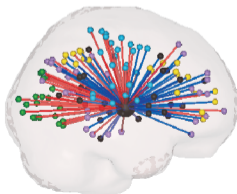

- Cingulo-opercular
- Fronto-parietal
- Default
- Sensorimotor
- Occipital
- Positive  $\beta$
- Negative  $\beta$
